# Supplementary material for: Importance of ice elasticity in simulating tide-induced grounding line variations along prograde bed slopes
Source: Copernicus journal article supplement (doi:10.5194/egusphere-2024-875), 2024-04-15
Supplement: Supplementary file [file egusphere-2024-875-AC3-supplement.pdf]

## Response to Reviewer 2

**Blue font:** comments from Reviewer 2

**Black bold font:** Authors' responses to the reviewer's comments

**Note 1:** The Reviewers recommended major revisions, including restructuring the text and redoing certain measurements. The paper is almost entirely rewritten and highlighting these changes would significantly hinder the manuscript's readability. Therefore, the revised version does not highlight the corrections introduced.

**Note 2:** The line numbers provided here correspond to the revised version of the manuscript.

Review of "Importance of ice elasticity in simulating tide-induced grounding line variations along prograde bed slopes" by Maslennikova, et al.

This manuscript compares tidally induced grounding zone width observations to viscous and viscoelastic models to show the viscoelastic model better aligns with observed grounding zone widths. The authors calculated grounding zone widths at Totten, Moscow University, and Rennick glaciers using differential interferometric synthetic aperture radar (DInSAR) by finding the along-flow difference in grounding line location between image pairs taken at two different tide heights and implemented a 2D model of ice response to tides for parameters representative of these three glaciers. The model showed wider grounding zones for shallower bed slopes and wider grounding zones for thicker glaciers, consistent with observations. Furthermore, the model predicted that slow glaciers on steep slopes and fast glaciers on shallow slopes cause the grounding zone to respond most to ice thickness changes.

This paper represents a significant contribution toward modeling tidally induced grounding line variation by providing key comparisons to observed grounding zone widths and recommending a viscoelastic rheology be used in future modeling efforts. The formation of wide grounding zones from tides is an important process impacting basal conditions and ice dynamics, but is often neglected in larger-scale ice flow models. A better understanding of this process, such as from modeling-observation studies like this paper, is essential for more realistic modeling at this critical transition zone. However, the current structure of and analysis in the manuscript obscures this important conclusion, resulting in a difficult to read and difficult to digest manuscript. Below, we highlight four main issues, including that: the main results are hidden across multiple sections (including the appendix), making it harder for readers to understand the key messages; the revised model is not fully described; the InSAR processing does not provide enough details to reproduce or interpret the mapped grounding lines; and the presented figures and tables are often hard to interpret, decreasing their effectiveness. Because addressing these issues will require substantial reworking of the manuscript, we have opted to not list line-by-line minor comments.

**We appreciate the Reviewer's feedback and have made our best efforts to address the provided concerns. Below, we provide a detailed explanation of the corrections made in response to each comment.**

### **Issue 1: The structure of the paper hides the key contributions of this manuscript**

For example, methods used in the manuscript appear in Section 2 ("Data and Methods"), Section 3 ("Viscous and viscoelastic models"), Section 4 ("Results"; e.g., lines 211-227 cover how model parameter space and mesh size were determined; lines 238-247 contains more methodological description of the modeling effort), Section 5 ("Discussion; e.g., lines 328-336 describe filtering methods), and Appendix A ("Glacier modeling").

**We have significantly revised the manuscript structure. The model utilizes glacier thickness, ice flow velocity, and bed slope as input parameters. Then, we use DInSAR-derived grounding zones to compare the input parameters with model outputs. For this reason, the 'Data and Methods' section is now structured as follows:**

1. Brief description of the studied glaciers;
2. Explanation of the profiles selection process based on flow velocities and calculation of the ice velocities corresponding to each profile.
3. Calculation of ice thicknesses and bed slopes along the profiles;
4. Grounding zone width measurements along the selected profiles.

**We have also rewritten or reallocated entire sections. The statements mentioned by the Reviewer describing the modelling efforts were moved into the 'Viscous and Viscoelastic models' section (lines 193-365):**

- **Lines 211-227 of the original manuscript, which described how model parameter space and mesh size were determined (previously in the Results section), have been moved to the 'Viscous and Viscoelastic Models' section.**

- **Lines 238-247 of the original manuscript, containing a methodological description of the modeling effort (previously in the Results section), have been relocated to the 'Viscous and Viscoelastic Models' section.**
- **Lines 238-247 of the original manuscript describing filtering methods have also been moved to the 'Viscous and Viscoelastic Models' section.**
- **The Appendix of the original manuscript has been revised and integrated into the 'Viscous and Viscoelastic Models' section.**

In fact, the substantial contribution of the manuscript—a new viscoelastic model that can capture a tidally variable grounding zone—is largely relegated to the appendix rather than the methods section of the main text.

**We thank the reviewer for the valuable feedback and agree that the formulation of the viscoelastic model is a significant contribution of our research. We have revised the Appendix section and incorporated it into the 'Viscous and Viscoelastic Models' section (lines 193-365).**

Results from the methods described in the manuscript appear throughout sections 4 (“Results”), 5 (“Discussion”; e.g., lines 261-271), and 6 (“Conclusion”; e.g., lines 408-413).

**The paper structure was revised and most of the text rewritten. The modeling-related information was moved to the ‘Viscous and viscoelastic models’ section (lines 193-365).**

In addition, the conclusions (Section 6) take the manuscript in a largely unrelated direction, ending with grounding line retreat estimates over multiple decades—a topic that is explicitly not the focus of the manuscript.

**We believe that the section the reviewer is referring to (the last paragraph of the Conclusions section in the original manuscript) offers valuable insights for the cryosphere community, which is why we consider it important to retain. However, we agree with the Reviewer that it is not directly related to the conclusions of the research. Therefore, we have moved the section to the Results section (lines 366-488).**

With information scattered throughout the manuscript, it takes multiple reads to piece together the full scope of the work.

**We apologize for this inconvenience. We have significantly revised the manuscript structure.**

Perhaps more importantly, with so much jumping between topics and concepts, there is no deeper discussion of the physical implications of the data/model comparison. For example, if the viscoelastic model is better than the viscous model because of the short time-periods involved, how does a fully elastic model compare (i.e., why not save the computation time and just implement an elastic model for realistic grounding zone width estimates as suggested by Warburton et al., 2020)?

**Agreed, we have now included a section titled ‘Role of Elasticity,’ dedicated to discussing the significance of elasticity and explaining why we believe a viscoelastic model better captures glacier dynamics compared to a purely elastic model (lines 513-546). Additionally, we have addressed the physical importance of elasticity in the Conclusions (lines 548-566).**

Does cross-flow heterogeneity matter for the data/model comparison (in other words, does Rennick match the best because it is the simplest geometry or another physical reason)?

**Crossflow heterogeneity can play a role, as the grounding lines may not be perpendicular to glacier flow. Here we have tried to include only grounding lines perpendicular to the glacier flow. We mentioned this aspect in the text (lines 103-104).**

What are the physical reasons for the trends in Figure 5c? (note: Figure 5 is also only first introduced in the Conclusion section, which highlights this structural issue since this section should not contain new analysis). What is the physical reasoning (or even a hypothesis) for why slow glaciers on steep slopes and fast glaciers on shallow slopes cause the grounding zone to respond most to ice thickness changes (lines 284-286)?

**Models and data indicate that wider grounding zones are found where glaciers are thicker. This result can be associated with the increase of the flexural wavelength of ice when its thickness increases (Freer et al., 2023). For thicker ice, the same tidal amplitude affects a larger horizontal distance, leading to a broader grounding zone. This effect is more pronounced on shallow slopes, where the tidal amplitude influences a larger area.**

Glacier velocity significantly impacts grounding zone width for bed slopes below 0.1% due to the increase in elastic stresses with faster glacier flow (Christmann et al., 2021). As a result, the elastic stress of fast-flowing glaciers on shallow slopes is higher than that of slower-moving glaciers, making the former more sensitive to thickness changes.

This figure is now moved to the ‘Discussion’ section and the ‘Conclusions’ section was revised. We have included the physical explanation of the observed dependence (fast glaciers on shallow slopes are more sensitive to thickness change than slow glaciers) – lines 491-501

How do DInSAR measurements at these glaciers validate the model for other glaciers (suggested in the Abstract in line 20), especially with the high variability observed at just these three glaciers?

The statement was removed from the Abstract.

We also note that the lack of “flow” in the writing of the manuscript sometimes inhibited our ability to make connections throughout the paper. For example, the model run-time discussion (lines 253-258) interrupted a clean transition from results to discussion (and likely could be included in supplementary material rather than the main text) and the “discussion” of slope coefficients (line 275-285) was quite difficult to comprehend even after multiple tries.

The paper has been significantly revised. The model run-time discussion is now in a newly created ‘Model setup’ section (lines 296-365), which summarizes all the modeling efforts.

Overall, the entire manuscript should be revised with a close eye to structure at all scales—from making sure individual sentences are structured appropriately (e.g., lines 34-35 after the semicolon are a sentence fragment) to ensuring that information in an individual paragraph flows from the topic sentence to making sure all of the introduction is in the introduction, methods are in the methods, and so on.

Agreed, we have significantly rewritten the manuscript.

#### **Issue 2: There are multiple conceptual problems with the model that are un-/under-described**

As suggested above, the main message of the manuscript is the appropriateness and usefulness of the viscoelastic model (compared to a viscous model), but the changes from Stubblefield et al., (2021) to make the model viscoelastic are relegated to Appendix A. Any changes from the Stubblefield et al., (2021) model are key contributions and therefore should be placed in the main text (e.g., Equations A6-A10), which can be guided by Table 1 (a table that likely can be removed if the modeling methods are appropriately described in the main text).

The information from the Appendix was revised and placed to the main text to the ‘Viscous and viscoelastic model’ section.

We have not changed the contents of Table 1 from the original manuscript, as we believe it provides a concise summary of the model formulation. Additionally, we find it useful to retain this table because it informs the reader about the computational time required for both models. However, after relocating the model formulation to the main text, we felt it was unnecessary to keep the table in the main text. Therefore, Table 1 has been moved to the Supplementary Materials (now Table S4 in the revised manuscript).

Beyond the lack of description of key modeling efforts in the main text, there are additional conceptual concerns with the model that are not resolved. Below is a subset of the details missing from the model description that fundamentally impact the fidelity and impact of the results. The modeling efforts undertaken in the manuscript need to both appear in the main text and be more fully described before the full impact of the manuscript can be assessed.

Model spin up occurs over a two-month period with water-level set to low tide (lines 243-246, which we note appears in the Results section): why did you choose low tide? Is that the “neutral” stress state? Does choosing a zero-tide or high-tide condition for spin up change the results of the modeled grounding zone width?

We apologize for the confusion caused by the sentence wording. In the context of the Reviewer's question, a zero-tide position was used to run the model over a two-month period (not a low-tide position). This zero-tide position was set by Stubblefield et al. (2021) for the originally developed viscous model, and we did not change it for the viscoelastic model.

The Reviewer raised an interesting question: would the grounding zone width change if a different starting tidal level were used? To address this, we conducted additional model runs for different starting tidal levels: at 0 tide, high tide, and low tide (while keeping the same glacier parameters). We found that the grounding zone width did not change with these initial tidal level variations. We included this finding into the model setup description (lines 346-349).

This section describing model spin up and experiment duration uses phrases like “enhances results accuracy” and that “models adapt and stabilizes [sic]” after 3-5 days of variable tides, so that the grounding zone width during days 5–7 can be used as the modeling deliverable—how is accuracy and model stabilization defined here since these form the key deliverable of the manuscript?

**The choice of a one-week time limit for the tidal problem allows the model to adapt to tidal impacts. In most tidal model simulations, the grounding zone width slightly increases within the first 3 to 5 days with each tide while the models adapt and stabilize afterward. Several test runs, lasting up to 14 days within the modeling framework, were conducted to estimate the impact of the grounding zone width increase during the initial days. These test runs show that the grounding zone width stops changing after the first five days and remains stable, showing no significant variations afterwards. The initial increase occurs gradually, with the initial grounding zone width being, on average, 80% of the final stabilized width, which is reached after 5 days. Therefore, the resulting grounding zone width value for each model run is determined as the average of the grounding zone width values simulated for days six and seven. This aspect was clarified in the revised manuscript (lines 349-357).**

The inflow velocity of the model is prescribed as a constant, but results from across Antarctica show tidally variable ice velocity on time periods from diurnal to fortnightly and semiannual. Is this inflow boundary condition realistic and/or does variable inflow velocity matter to grounding zone width?

**The current model does not account for variable ice velocities at the inflow boundary, which is a significant simplification. However, our parametric analysis reveals that grounding zone width is not particularly sensitive to changes in glacier velocities (Figure 5).**

How was data from BedMachine integrated into this modeling framework? For example, how was bedrock slope calculated? Figure 1 makes it clear that there is not a “single” slope value, but rather it is highly variable. Is the reported value per flowline just the slope between end points? A linear fit to all the topographic data on a flow line? A mean slope after differentiating bed topography along a flowline? Is it a slope over a certain characteristic length scale that impacts ice flow? Why even reduce the bedrock slope to a single number when the true bedrock topography along each flowline could be incorporated into the finite-element model? Does the true topography vs. a simplified version impact the results?

**The process for calculating velocity, slope, and thickness values along each profile has been clarified in the revised manuscript (lines 98-107, and 119-124). Thickness values were extracted along the profiles and the average thickness was calculated for each profile. Bed slopes were determined for each profile using the 500 m-resolution BedMachine Antarctica topographic map by linearly approximating extracted bed elevation values and calculating the slope of the fitted line. Several test runs using true topography demonstrated that it does not significantly impact the results compared to the simplified topography. Therefore, we opted to use simplified bedrock geometry instead of true topography to better represent the range of input parameters rather than focusing on individual profiles.**

The definition of  $H$  from Equation 8 is unclear. Is it only the starting glacier thickness at the position of the starting grounding line? Would you want to compare ending thicknesses at the position of the ending grounding line?

**$H$  is a function of time. However, the code does not directly calculate the evolution of  $H$ . Instead, it calculates the evolution of the upper and lower glacier surfaces within a tidal cycle. The evolution of  $H$  can be estimated as the difference between the positions of the upper and lower surfaces. Upon analyzing the model outputs, we do not observe any significant changes in glacier thickness during a tidal cycle. Therefore, we feel that including these calculations of changes in  $H$  as a function of the tidal cycle is beyond the scope of this study.**

### **Issue 3: The DInSAR processing and analysis is not fully described, which impacts the quality of the model/data comparison**

Perhaps most importantly, the differential tide-heights of the interferograms are never mentioned in the manuscript, yet the results from these observations are compared to “tides with a 1 m amplitude” in the model (line 177). Since the grounding zone width depends on the tidal amplitude, are the DInSAR results showing a 1 m tidal amplitude (note: it is not clear whether this means  $\pm 0.5$  m tides or  $\pm 1$  m tides for the modeling effort)? If they are not, this is not an apples-to-apples comparison between the observed widths and modeled widths (i.e., the overlap between modeling results and DInSAR analysis in Figure 4c may in fact indicate that the model has substantial bias). There are some

good examples showing clear DInSAR differential tide estimates in the literature (e.g., Table 1 in Milillo et al., 2017 or Table SI in Milillo et al., 2022).

**Agreed.** We have added Table S6, which summarizes the Tidal and Inverse Barometer Effect (IBE) components. The glaciers experience 1-meter amplitude tides (2 meters peak-to-peak). Therefore, the model setup utilizes a sinusoidal wave with a 1-meter amplitude. However, after applying the IBE correction, differences in tidal heights between the corresponding pairs of DInSAR interferograms are 0.95 m for MU, 1.03 m for TOT, and 1.08 m for REN (Table S6). To ensure a valid comparison between the DInSAR measurements and the model outputs, the modeled grounding zone measurements are referenced to the corresponding IBE-corrected maximum tide (column H in Table S6) for the DInSAR interferograms. This clarification has been added to the text (lines 156-178).

The InSAR processor used is not mentioned in the manuscript (and thus the results are not reproducible). GAMMA software was used for data generation, which we now mention in the text (lines 139-140).

The text says uncertainty of manual grounding-line mapping was “empirically determined” to be 200 m (line 228) with no additional explanation. What were the methods for assessing the uncertainty in grounding line delineation?

**We refer to the average accuracy of manual grounding line mapping from a DInSAR interferogram. Performing a grounding line mapping several times over the same interferogram, on average, a human expert may place a grounding line with a 200 m deviation (Rignot et al., 2014; Ross et al., 2024). We have clarified this aspect in the manuscript (lines 154-156, 182-183, and 332-333).**

The DInSAR grounding lines at high and low tide are (unsurprisingly) wiggly in Figure 1 and appear to intersect for Moscow University and Totten—how do you proceed when the low-tide grounding line is upstream of the high-tide grounding line (negative grounding zone width)?

**In these areas with “negative” grounding lines (GL), we did not analyze grounding zones for two reasons: 1) GL are too close to each other (within the manual mapping error) and therefore grounding zone measurements here are insignificant, 2) cross-flow heterogeneity can play a role as the grounding line is not a straight line perpendicular to flow.**

Do the tidal flexure patterns deviate from those observed on the glaciers studied in Rignot et al., (2014) and would that impact your results?

**We did not analyze the tidal flexure patterns in Rignot et al. (2014) as the authors did not provide unwrapped interferograms in either the main text or supplementary materials. Additionally, there is limited availability of grounding line data acquired at different tidal levels within timespans where horizontal flow has changed significantly, making it difficult to incorporate these data into our models. However, while we do have more recent grounding zone data for the Amundsen Sea Embayment (Milillo et al. 2019, Milillo et al. 2022), these areas are primarily characterized by negative bedrock slopes, which we plan to address in a follow-up study.**

Finally, how were the flow lines for determining grounding zone width chosen? They look quite straight; are they the true path of an ice parcel or an estimate? Would choosing different flowlines substantially impact your results? We quickly show that estimated flowlines on Totten Glacier (below, left panel, black lines) do not match the lines in Figure 1 (below, right panel) with substantial differences in flow direction, suggesting grounding zone widths reported in the manuscript may contain substantial unaccounted for error:

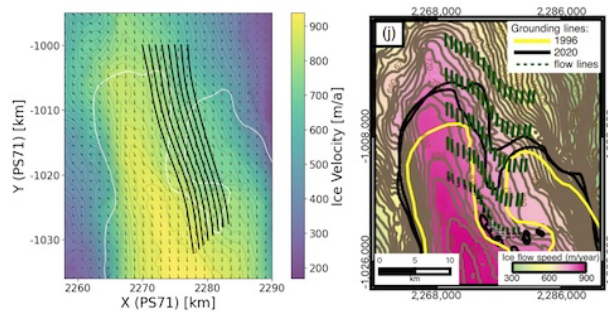

**We greatly appreciate the comment and have re-analyzed the data accordingly. We adjusted the direction of the profile lines to align perfectly with the ice flow direction (see Figure 1 and lines 98-107). We recalculated**



the parameters for the glaciers and the grounding zone widths. The updated results are presented in Figure 6, Figure 7, Figure S1, Figure S4, Table S1, and Table S5. These new results show improved correspondence between the DInSAR-based measurements and the data compared to the original analysis. Therefore, in response to the reviewer's question, 'Would choosing different flowlines substantially impact your results?', the answer is no. While the individual results did change, the average values of all the parameters remained nearly unchanged (see Table S1). As a result, the overall assessment of the models' performance was not significantly impacted.

#### **Issue 4: Figures and tables are not of publishable quality.**

For example, Figure 1 does an excellent job at conveying a lot of information, but there are several aspects that make it hard to interpret. There are no figure limits for this journal, so it is not clear why so much information is compressed into one figure. Unpacking the panels into multiple figures will help strengthen your argument as will considering the following issues:

**We have divided Figure 1 into three separate figures: the location of the glaciers of interest in Antarctica and the ice velocity map (Figure 1), the bed topography and the ice thickness map (Figure 2), and the DInSAR interferograms with the grounding zones (Figure 3). We have also addressed the rest of the Reviewer's concerns (see below).**

- Having the same color scale with different ranges makes comparison between glaciers unintuitive. Color scales should be sequential and perceptually uniform covering the same range for all three glaciers where reasonable and explicitly stating if you diverge from this standard to make sure the reader does not misinterpret a panel (as we did initially).

**In the revised version of the manuscript, the colorbars were made uniform across the glaciers. We made the colorbars by following the recommendations from Crameri, F., Shephard, G. E., & Heron, P. J. (2020). *The misuse of colour in science communication*, *Nat. Commun.*, 11, 5444.**

- Several labels are far too small and hard to read. For example, the numbering of the flowlines is near impossible at 100%.

**The labels were enlarged in the revised version of the manuscript.**

- Several color choices are difficult to distinguish. For example, the blue dashed line indicating the high (low) tide grounding line is nearly invisible in panel I (o).

**In the revised version of the manuscript, the colors were modified to improve the clarity.**

- Please label which glacier corresponds to which column.

**The glaciers were labeled in the revised version of the manuscript.**

- Colorbars in the bottom two rows should not be labeled dz as the colors show a wrapped interferogram. It is not even clear that this is phase projected into the vertical z component, so clarity on this label is important. 'dz' was replaced with 'DInSAR phase' in the revised version of the manuscript.

Figure 3 does not provide a clear message and left us confused. Is there a specific trend that we are supposed to observe? If so, it might be beneficial to extract the panels that show this trend and move the rest to the supplement. If all the panels are important, we suggest adding additional labels showcasing what comparisons are relevant. Additionally, please make the axes limits consistent between plots so the reader can effectively compare between panels.

**We have modified the figure. Both models show that for bed slopes between 1% and 5%, glacier thickening affects the grounding zone by less than 1 km, while significant impacts are observed at 0.05% and 0.1% slopes (see Table S3). Based on this, we decided to exclude most of the slopes and retain only 0.05%, 0.1%, 0.5%, and 5% slopes as the most impactful (see Figure 5). The goal of this figure is to show that: 1) the viscous model predicts grounding zones twice as large as those of the viscoelastic model; 2) the evolution of grounding zone width versus glacier thickness is dependent on bed slope; 3) the grounding zone expands with decreasing bed slope. Additionally, the marker shapes were changed to make the figure colorblind-friendly.**

The horizontal bars in Figure 4 are not "error bars" as described, but rather are a range of modeling results (at least in our interpretation; the description of these bars in the text and caption was confusing).

**Corrected (lines 442-444).**

How are the pink and green outlines calculated in Figure 4 and 5?

**We have modified these figures (now figures 6 and 7) to make this aspect more evident and explained this in the text as well (lines 458-467 and 508-511).**

Why do different glaciers have different bin sizes in the histograms for Figure S3?

**We set the uniform bin width (now Figure S4).**

Table 2 does not explain what these numbers represent (e.g., are these means of the minimum, mean, and maximum of each flowline? What is represented by the  $\pm$  value?).

**The table has been moved to the Supplementary Materials as Table S1. It presents the minimum, maximum, and mean values for the glaciers, derived from all the flowlines associated with the glacier of interest. We mention this in the table description.**

Also “MeASURESs2” is not a data product—MEaSUREs is an acronym for a NASA funding program (Making Earth System Data Records for Use in Research Environments).

**In the revised manuscript, we specified that every time we mention the MEaSUREs InSAR-based ice velocity map of Antarctica (lines 65, 99, 111, 116, and 130).**

The organization of Table A1 is confusing—some of the geometric quantities are scalars, but there is a separate table heading for scalar quantities? H likely should be  $H(t)$ , l should be  $l(t)$ , there are no units provided (which would be quite helpful for the reader), and the scalars are bolded, which may be interpreted as a vector quantity.

**Table A1 has been revised as follows:**

- **The fields 'vector quantities', 'scalar quantities', and 'tensor quantities' have been combined under the heading 'physical quantities'.**
- **We have specified the type of each field (scalar, vector, or tensor) in a separate column, and only vector and tensor quantities have been bolded.**
- **We indicated that H and l are time-dependent by denoting them as  $H(t)$  and  $l(t)$ .**
- **Units have been provided in a separate column.**

The figures and tables all require dedicated consideration to make best use of journal space to support the text.

**The figures and tables have been reviewed and modified where necessary (see above).**

**We hope the revisions to the manuscript address the Reviewer's concerns and look forward to any further feedback.**
